# Supplementary material
Source: publisher site journal article supplement (http://www.spandidos-publications.com/3340/downloadSupplementary)

Figure S1. Characterization of hPDLs. (A) Primary hPDLs isolated from the periodontal ligament of the extracted tooth. (B) The 3rd passage hPDLs. (C and D) Immunofluorescent staining of hPDLs were negative for ectodermal markers [(C) vimentin], but positive for mesodermal markers [(D) cytokeratin]. Scale bars, 99  $\mu$ m. hPDLs, human periodontal ligament cells.

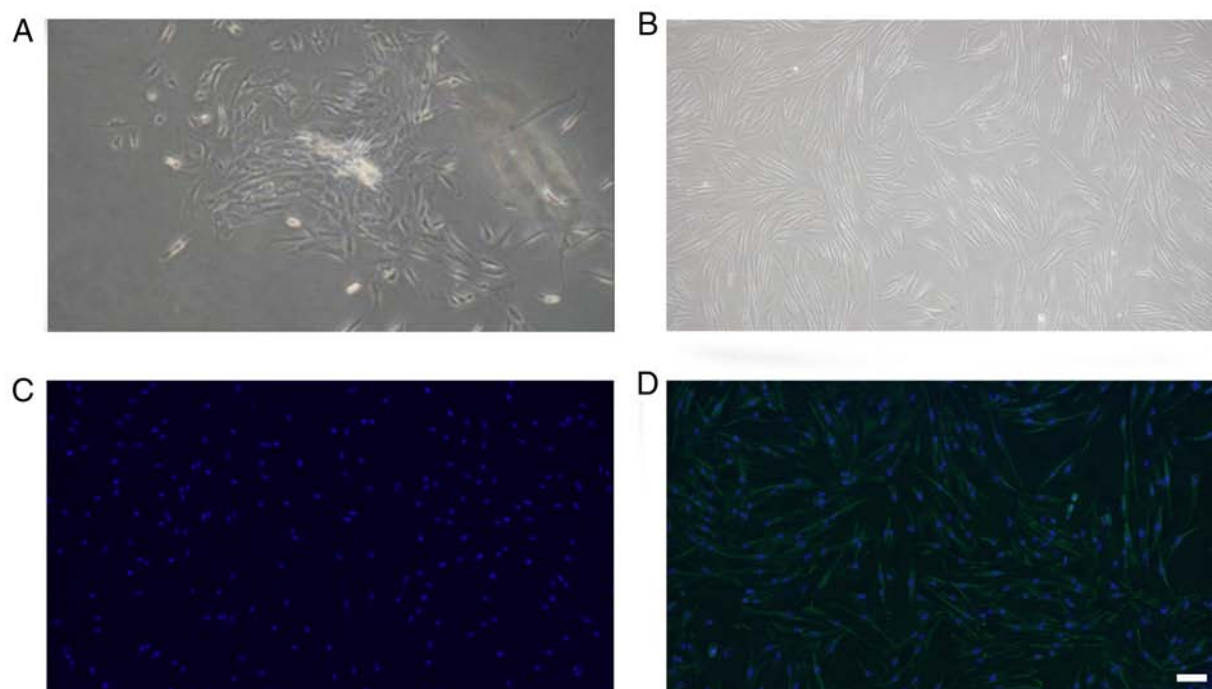

Figure S2. Raw image of the p-AKT (Ser 473) and GAPDH blots in Fig. 6.

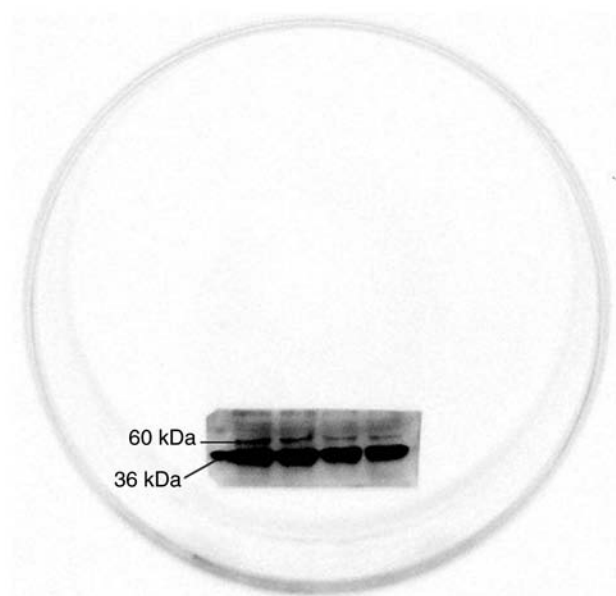

Figure S3. Raw image of the AKT blot in Fig. 6.

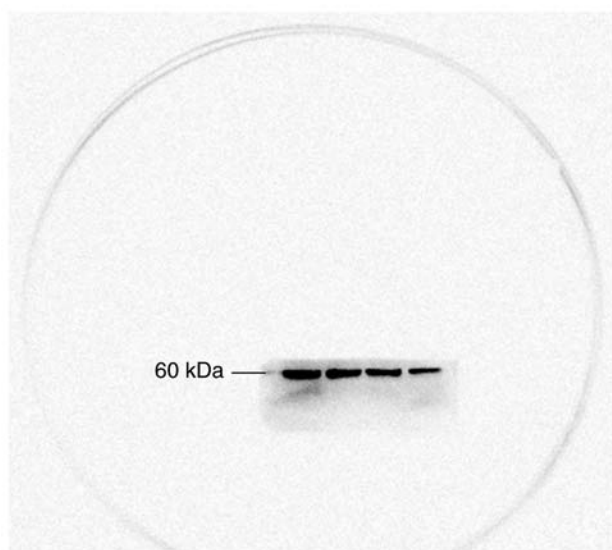

Supplement: Supplementary file 1 [file downloadSupplementary]
